# Supplementary material for: Efficient fullerene-based and fullerene-free polymer solar cells using two wide band gap thiophene-thiazolothiazole-based photovoltaic materials
Source: Royal Society of Chemistry journal article supplement (doi:10.1039/c6ta03288e), 2016-01-01
Supplement: c6ta03288e1.pdf [file c6ta03288e1.pdf]

## Supporting information

### Efficient wide band gap photovoltaic polymers based on thiophene-thiazolothiazole units for high-performance polymer solar cells

Kang Zhao<sup>1,2</sup>, Qi Wang<sup>1</sup>, Bawei Xu<sup>1\*</sup>, Wenchao Zhao<sup>1</sup>, Xiaoyu Liu<sup>1</sup>, Bei Yang<sup>1</sup>,  
Mingliang Sun<sup>2\*</sup>, Jianhui Hou<sup>1\*</sup>

<sup>1</sup>Beijing National Laboratory for Molecular Sciences, State Key Laboratory of Polymer Physics and Chemistry, Institute of Chemistry, Chinese Academy of Sciences, Beijing 100190, China

<sup>2</sup>Institute of materials science and Engineering, Ocean University of China, Qingdao 266100, P. R. China.

E-mail: [hjhzzl@iccas.ac.cn](mailto:hjhzzl@iccas.ac.cn), [xubowei2004@iccas.ac.cn](mailto:xubowei2004@iccas.ac.cn), [mlsun@ouc.edu.cn](mailto:mlsun@ouc.edu.cn).

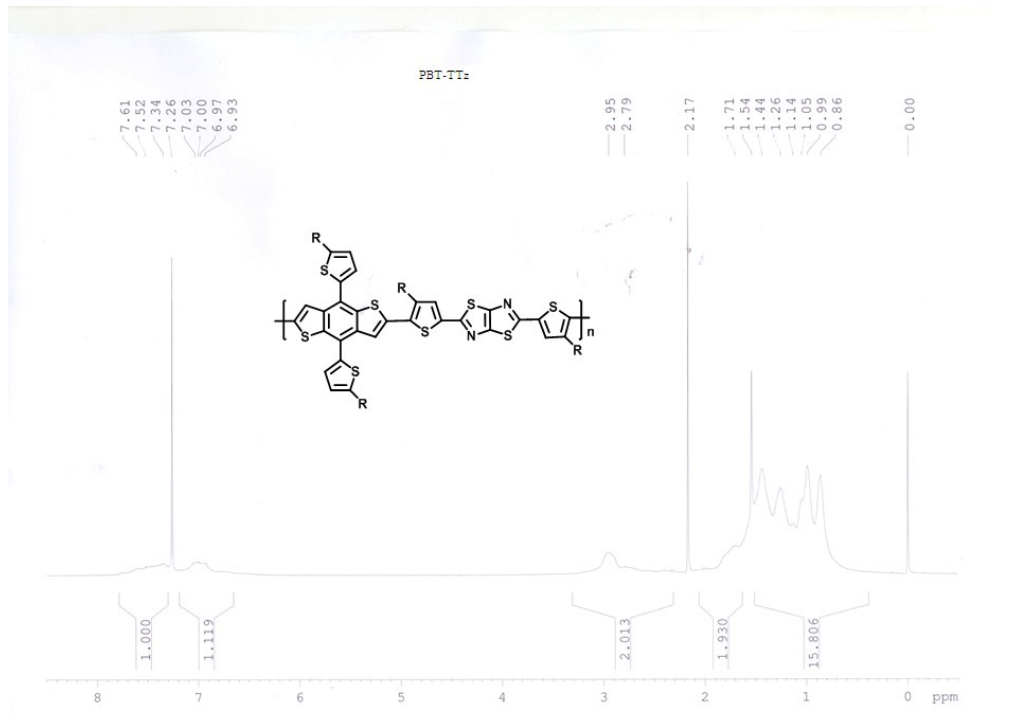

Fig. S1. <sup>1</sup>H NMR(400M, CDCl<sub>3</sub>) spectra of PBT-TTz.

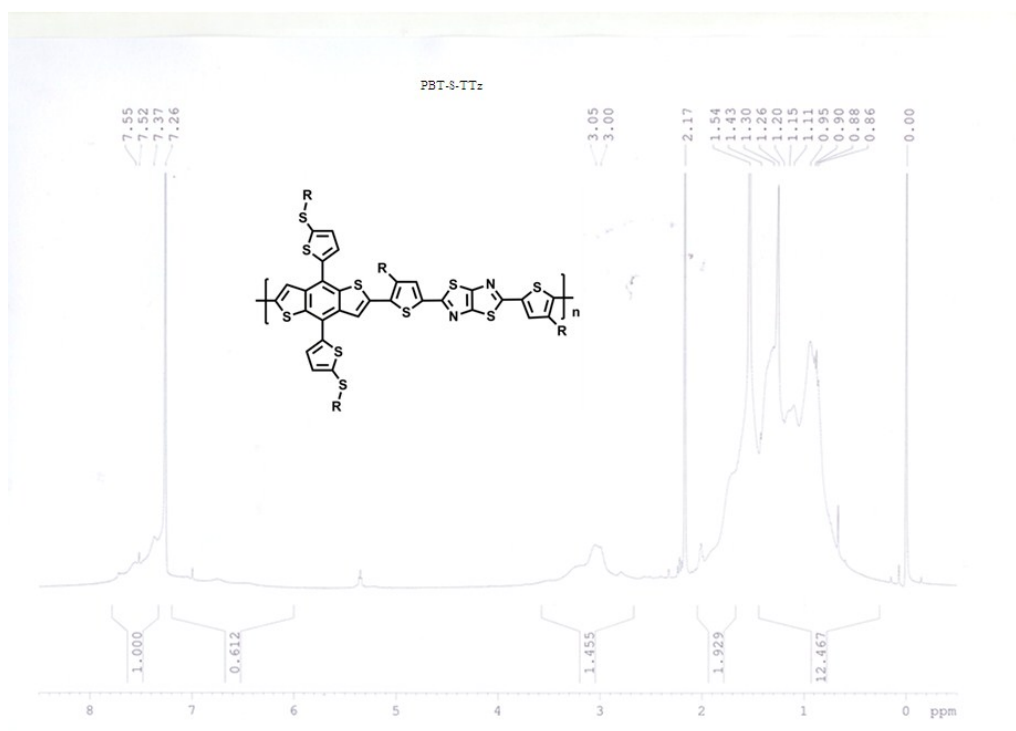

Fig. S2.  $^1\text{H}$  NMR(400M,  $\text{CDCl}_3$ ) spectra of PBT-S-TTz.

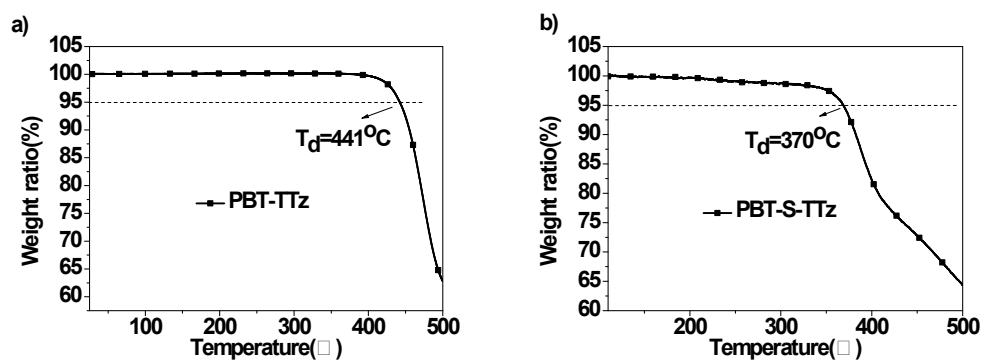

Fig. S3. Thermal Gravity Analysis (TGA) plots of the two polymers.

Thermal Gravity Analysis (TGA) was used to evaluate the thermal stability of the two polymers under Nitrogen atmosphere. As shown in the Fig. S3, after introducing sulphur atom into the side chain of the polymer, the thermal stability will decrease to 370°C due to the cleavage of Carbon-Sulphur single bond.

| Polymer   | LUMO | HOMO | $E_{\text{LUMO/HOMO}}$ (eV) <sup>a</sup> |
|-----------|------|------|------------------------------------------|
| PBT-S-TTz |      |      | -2.67/-5.00                              |

PBT-TTz

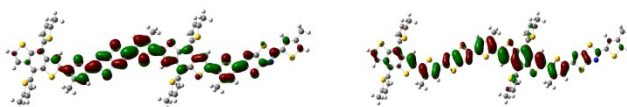

-2.51/-4.88

Fig. S4. Density Functional Theory of the two polymers.

Density Functional Theory (DFT) at the B3LYP/6-31G(d, p) level was employed to study the difference of the two polymers. As shown in Fig. S4, the two polymers showed almost the same electric cloud distribution which matched well with the actual situation. The values of  $E_{LUMO/HOMO}$  were stimulated by DFT, which quite fitted with the results calculated by cyclic voltammetry (CV).

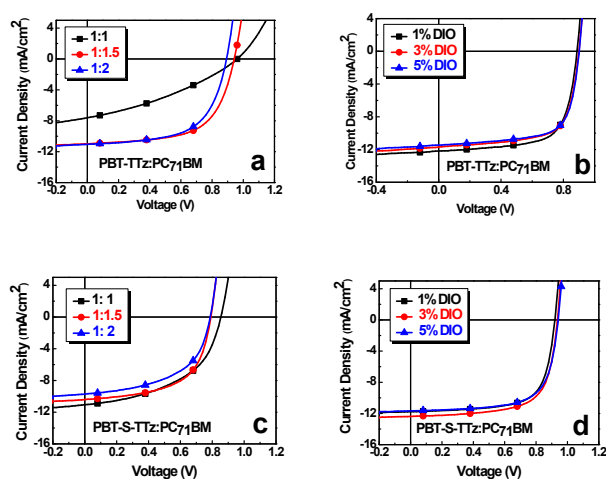

Fig.S5.  $J$ - $V$  curves of PSC devices based on (a and b) PBT-TTz:PC<sub>71</sub>BM and (c and d) PBT-S-TTz:PC<sub>71</sub>BM active layer with different D/A ratio and different DIO concentrations.

Table S1. Photovoltaic data of the PSC devices based on PBT-TTz:PC<sub>71</sub>BM and PBT-S-TTz:PC<sub>71</sub>BM active layer under the illumination of AM 1.5G 100 mW/cm<sup>2</sup>. The PCE values were averaged from five independent devices.

| Polymer Donor | D/A ratio | DIO additive | $V_{oc}$ (V) | $J_{sc}$ (mA/cm <sup>2</sup> ) | FF (%) | PCE/PCE <sub>max</sub> (%) |
|---------------|-----------|--------------|--------------|--------------------------------|--------|----------------------------|
| PBT-TTz       | 1:1       | w/o          | 0.961        | 7.21                           | 34.0   | 2.22±0.10 / 2.36           |
|               | 1:1.5     | w/o          | 0.942        | 10.98                          | 61.6   | 6.39±0.13 / 6.37           |
|               | 1:2       | w/o          | 0.892        | 11.05                          | 60.4   | 5.74±0.17 / 5.95           |
|               | 1:1       | 1%           | 0.887        | 11.49                          | 68.5   | 6.87±0.23 / 6.98           |
|               | 1:1.5     | 3%           | 0.899        | 11.69                          | 68.6   | 7.16±0.09 / 7.21           |
|               | 1:2       | 5%           | 0.902        | 11.46                          | 69.1   | 7.14±0.13 / 7.14           |

|           |       |     |       |       |      |                  |
|-----------|-------|-----|-------|-------|------|------------------|
| PBT-S-TTz | 1:1   | w/o | 0.854 | 10.48 | 49.7 | 4.18±0.27 / 4.45 |
|           | 1:1.5 | w/o | 0.791 | 10.41 | 58.7 | 4.57±0.27 / 4.83 |
|           | 1:2   | w/o | 0.787 | 9.21  | 53.3 | 3.57±0.25 / 3.86 |
|           | 1:1   | 1%  | 0.92  | 11.78 | 69.7 | 7.39±0.16 / 7.55 |
|           | 1:1.5 | 3%  | 0.936 | 12.39 | 68.3 | 7.45±0.17 / 7.92 |
|           | 1:2   | 5%  | 0.941 | 11.67 | 68.9 | 7.35±0.11 / 7.57 |

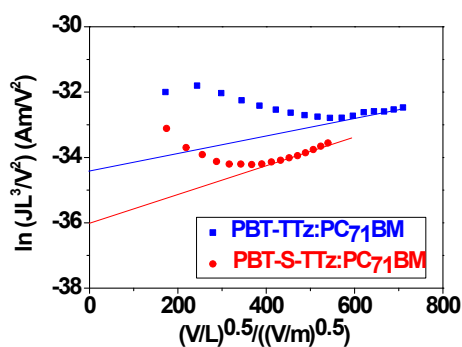

Fig. S6.  $\ln(JL^3/V^2)$  versus  $(V/L)^{0.5}$  plots of the polymers for the SCLC measurements.

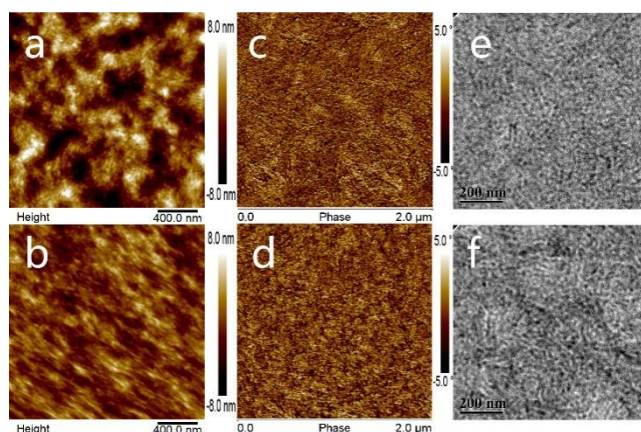

Fig. S7. AFM topography images (a and b), AFM phase images (c and d) and TEM images (e and f) of the polymer:ITIC active layers: (a, c and e) for the PBT-TTz:ITIC active layer; (b, d and f) for the PBT-S-TTz:ITIC active layer.

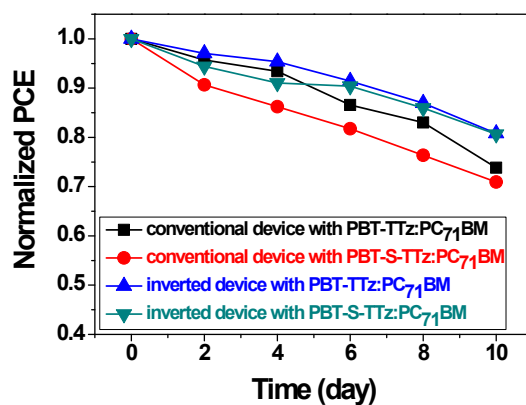

Fig. S8. Normalized PCEs as a function of time for fullerene-based devices stored for 10 days.

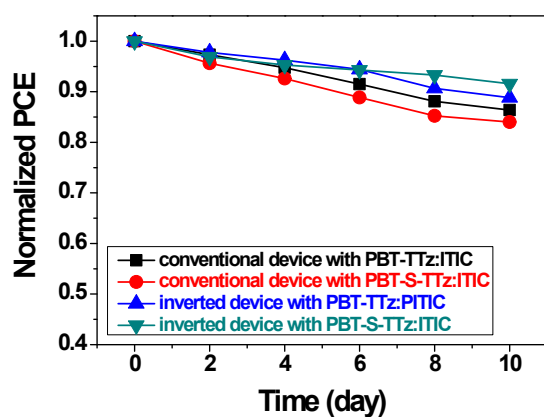

**Fig. S9.** Normalized PCEs as a function of time for fullerene-free devices stored for 10 days.

## References

- [1] S. Zhang, M. A. Uddin, W. Zhao, L. Ye, H. Y. Woo, D. Liu, B. Yang, H. Yao, Y. Cui, J. Hou, *Polymer Chemistry* **2015**, 6, 2752.
- [2] S. Zhang, L. Ye, Q. Wang, Z. Li, X. Guo, L. Huo, H. Fan, J. Hou, *The Journal of Physical Chemistry C* **2013**, 117, 9550.
